# Supplementary material for: Synthesis and Evaluation of Novel 2H-Benzo[e]-[1,2,4]thiadiazine 1,1-Dioxide Derivatives as PI3Kδ Inhibitors
Source: MDPI journal article supplement (doi:10.3390/molecules24234299), 2019-11-25

# Synthesis and Evaluation of Novel 2*H*-Benzo[*e*][1,2,4]thiadiazine 1,1-Dioxide Derivatives as PI3K $\delta$ Inhibitors

Ya-Ping Gong†, Long-Qian Tang†, Tong-Shen Liu, De-Feng Wang, Zhao-Peng Liu\*

Department of Medicinal Chemistry, Key Laboratory of Chemical Biology (Ministry of Education),  
School of Pharmaceutical Sciences, Shandong University, Jinan 250012, PR China

\*Correspondence: liuzhaop@sdu.edu.cn; Tel. +86-531-88382006; Fax: +86-531-88382548

<sup>1</sup>H and <sup>13</sup>C-NMR spectra and HRMS for compounds **15a–j** and **16a–d**.....2-15

**Compound 15a**

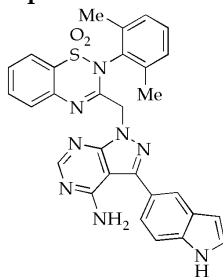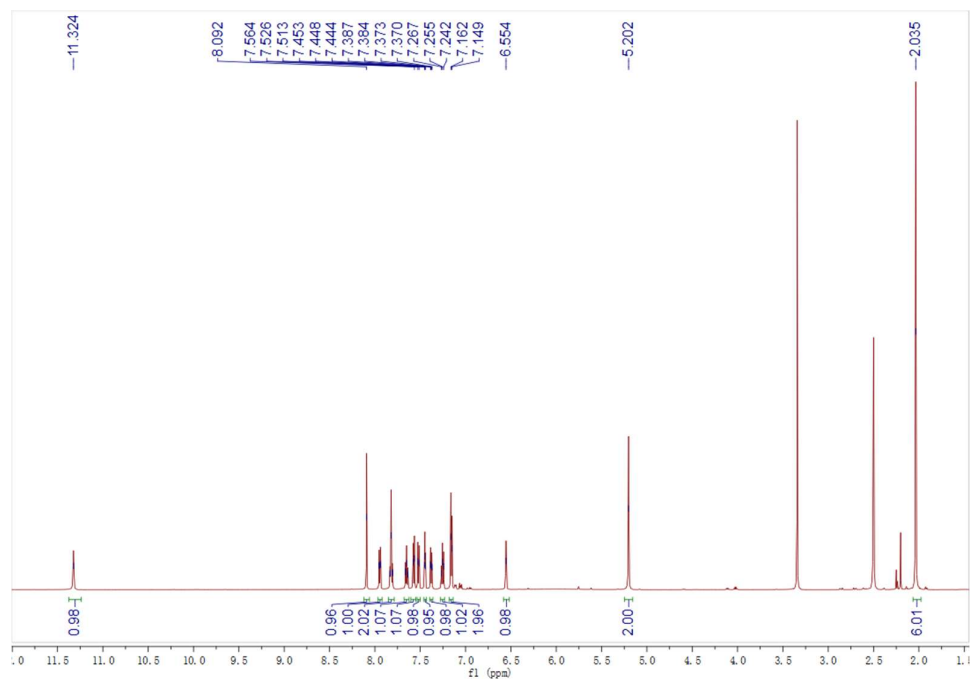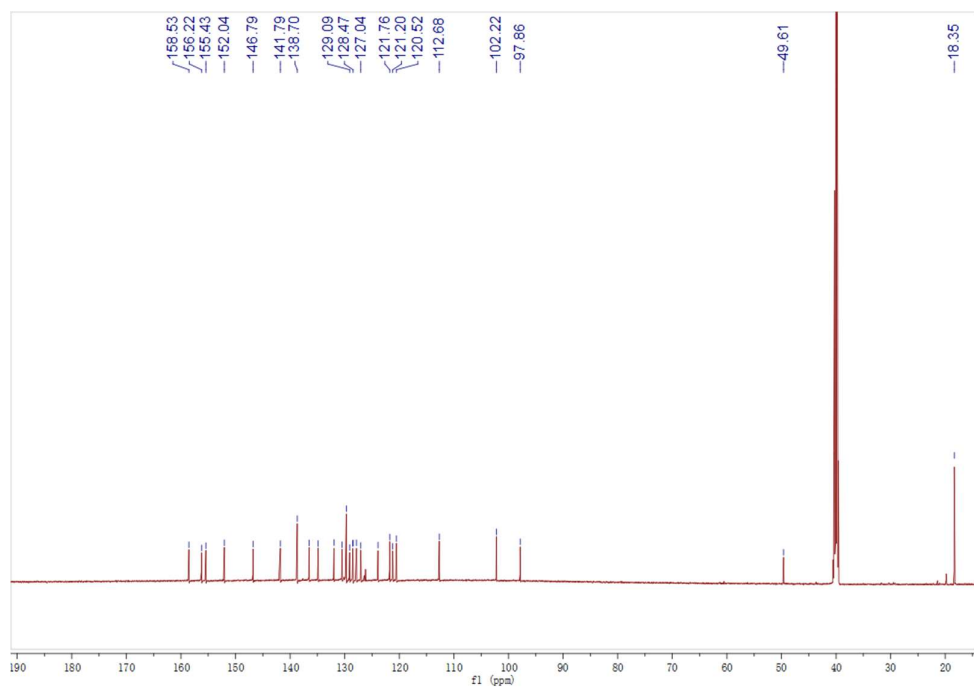

**Compound 15b**

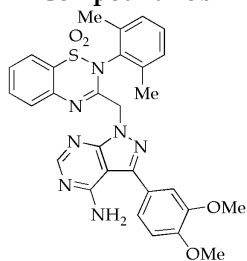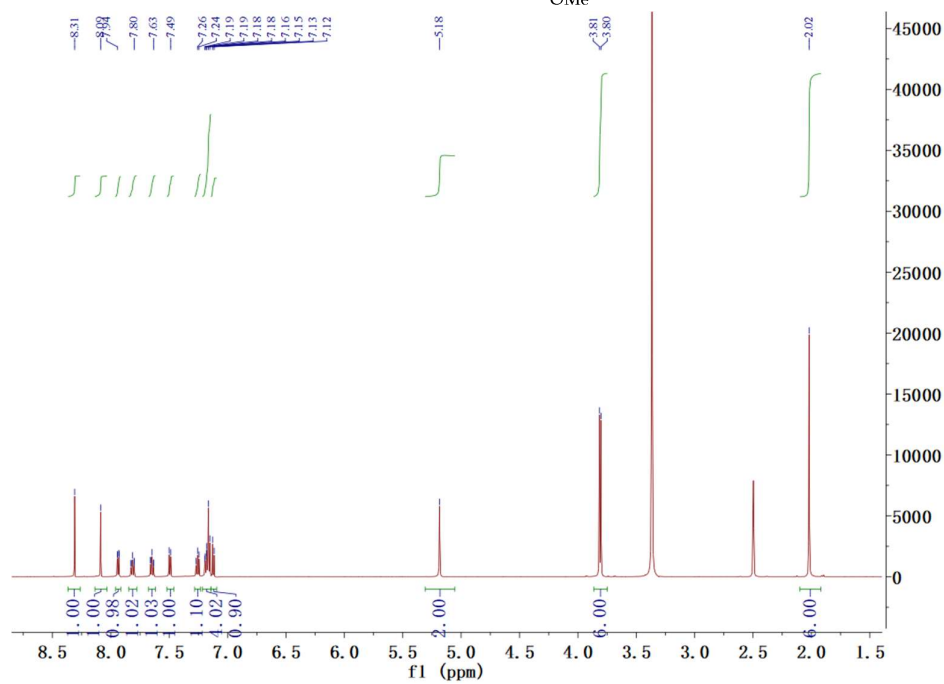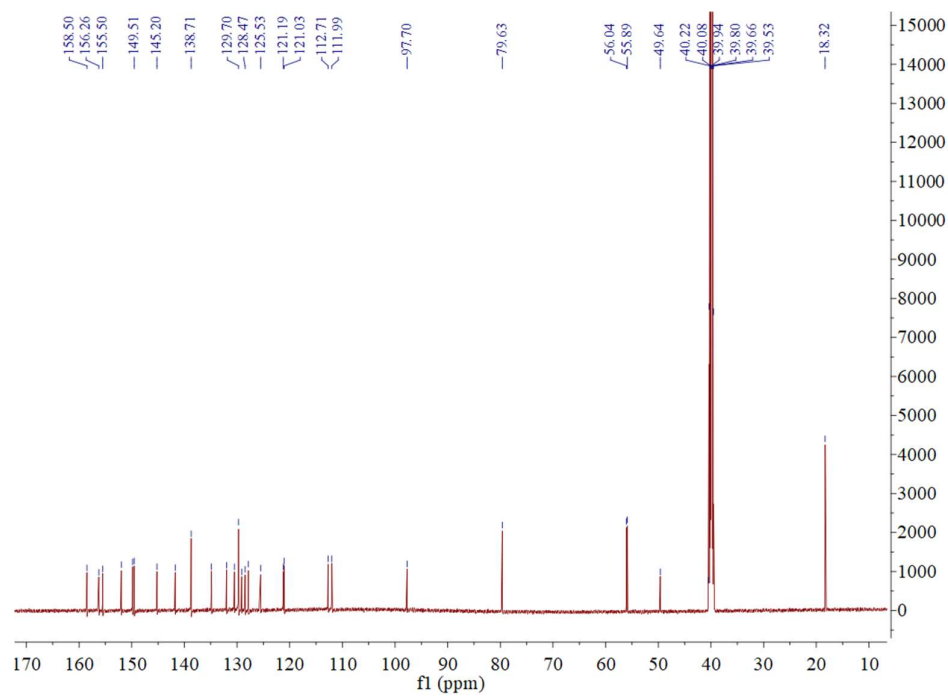

Compound 15c

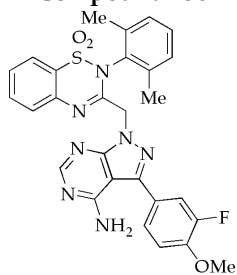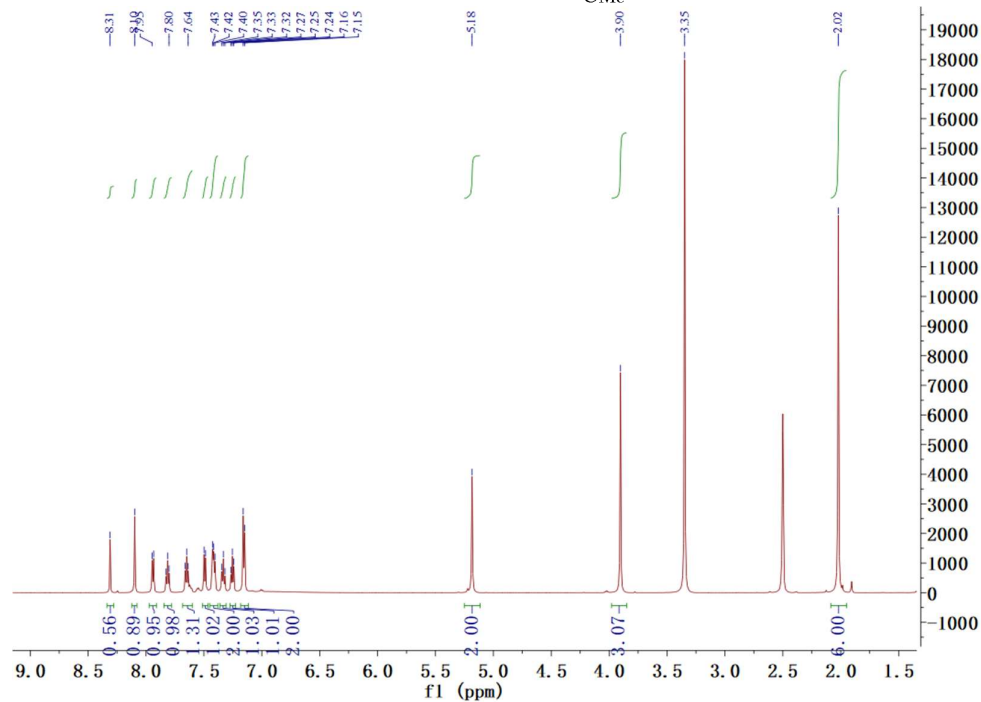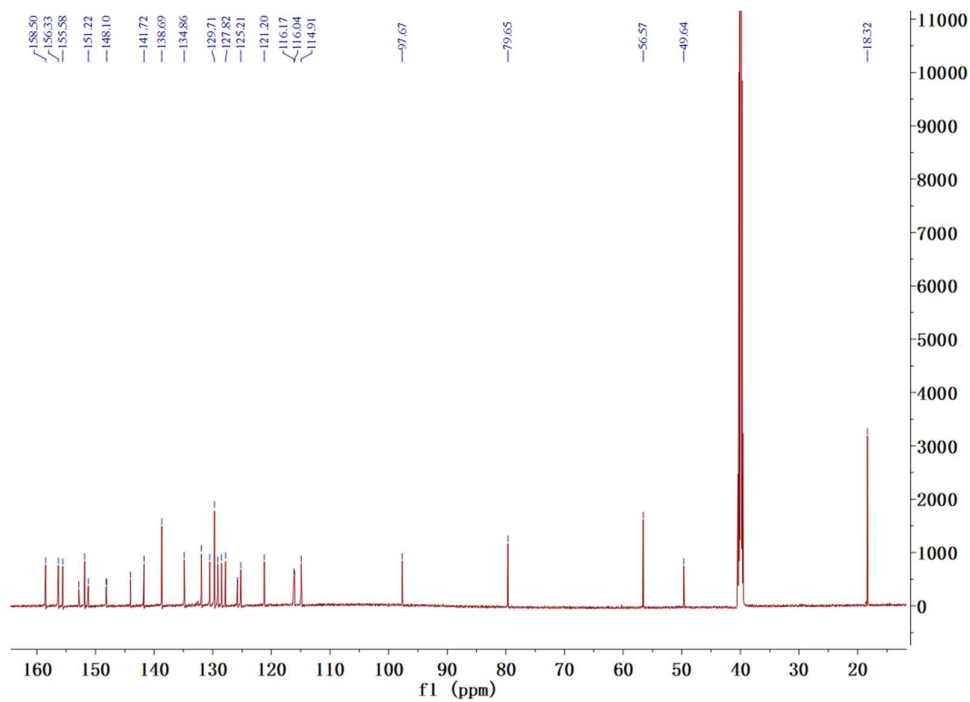

# Compound 15d

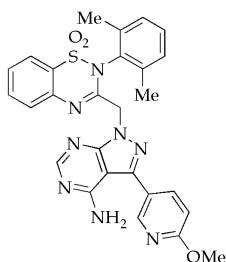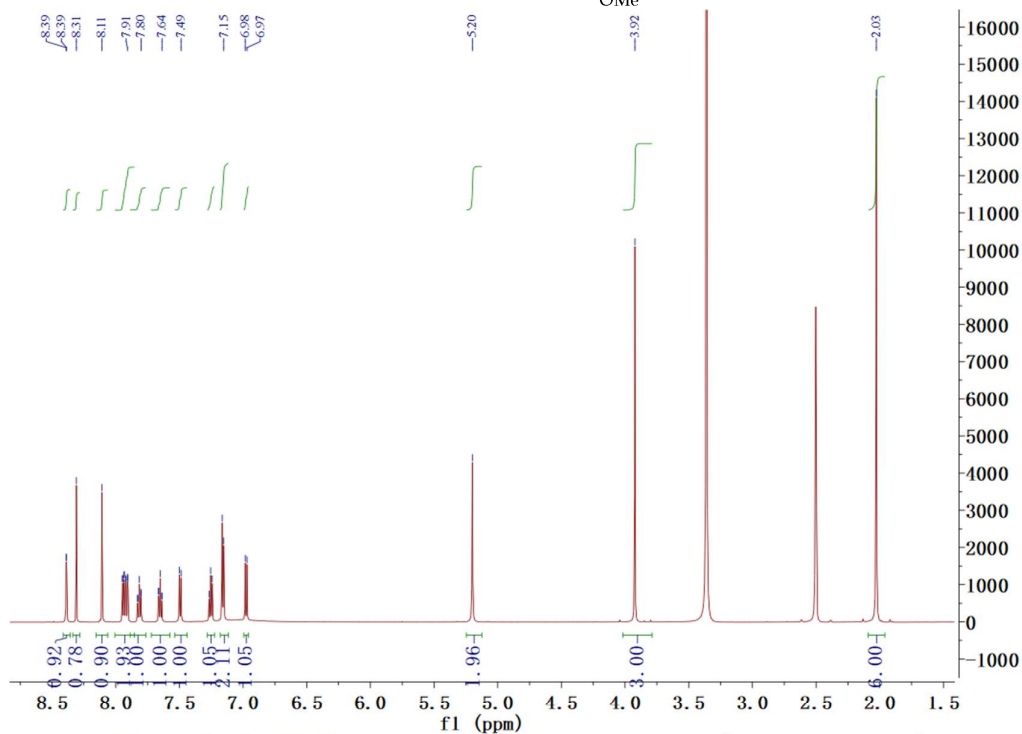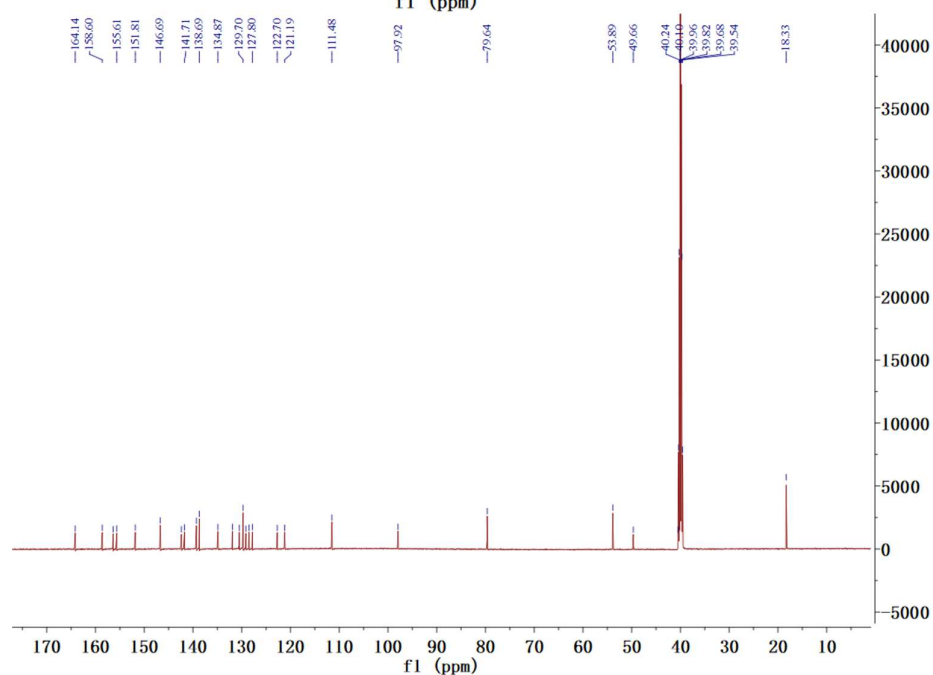

Compound 15e

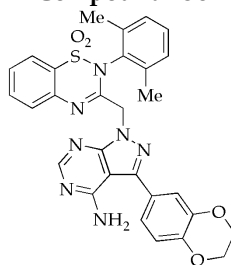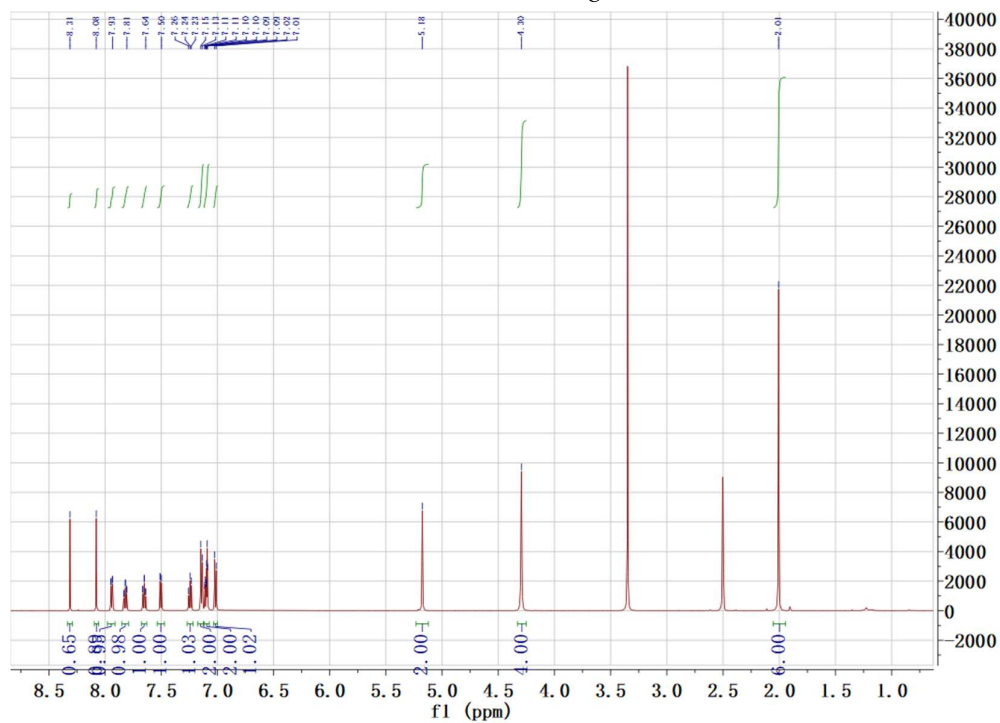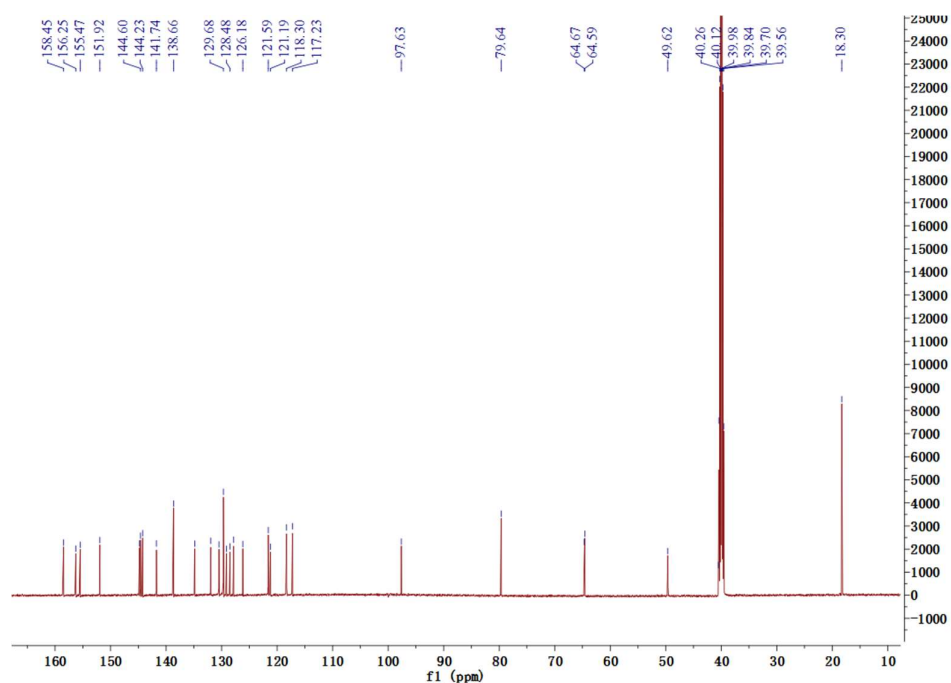

# Compound 15f

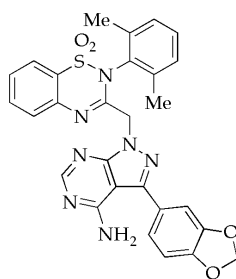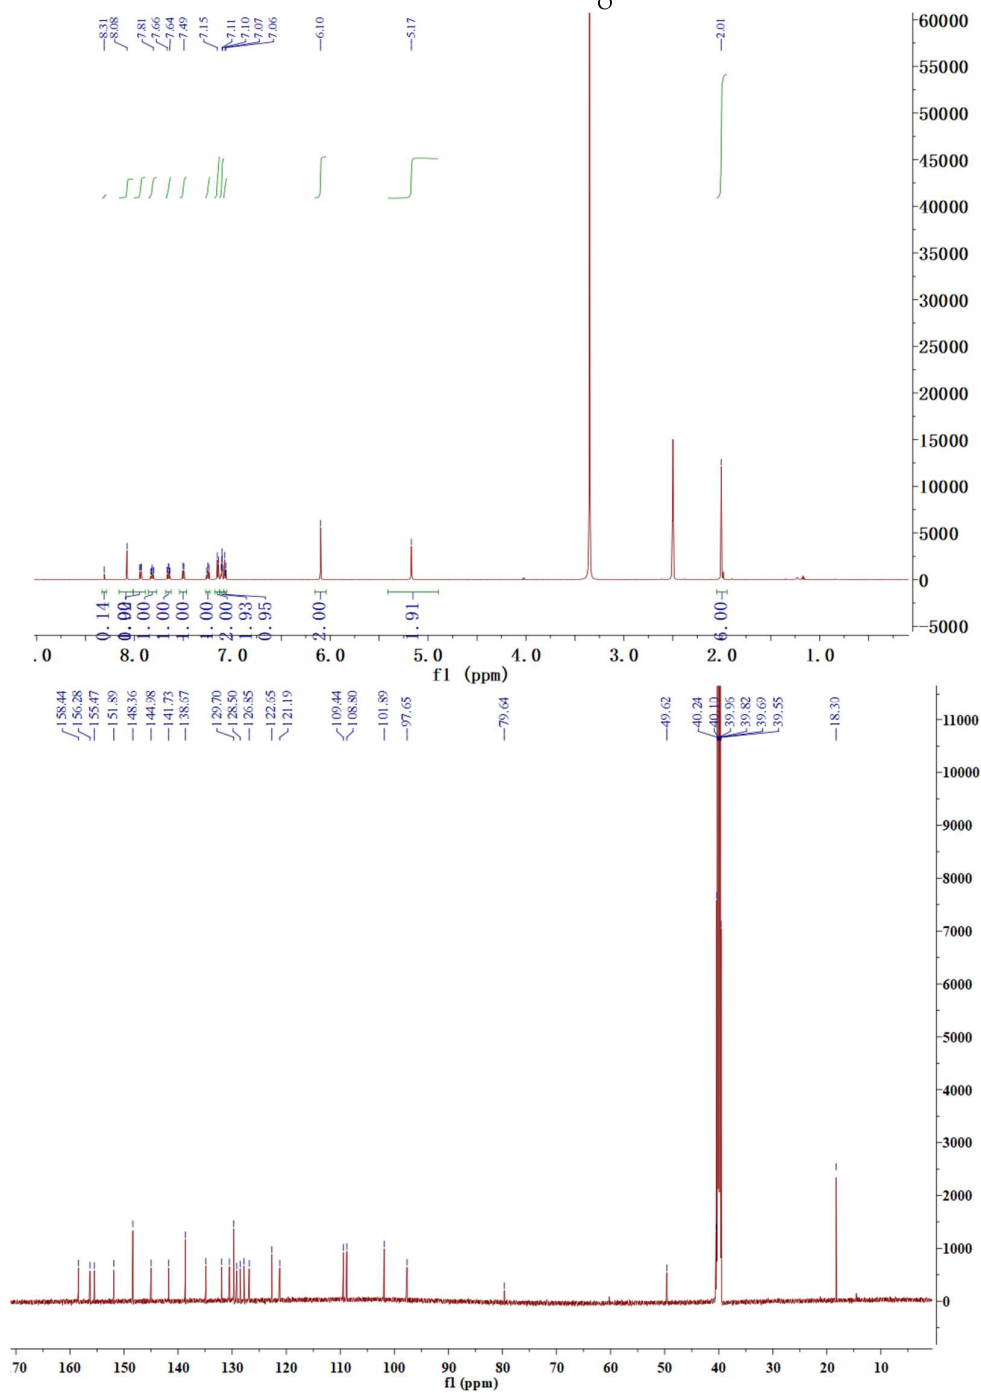

Compound 15g

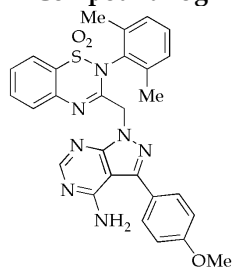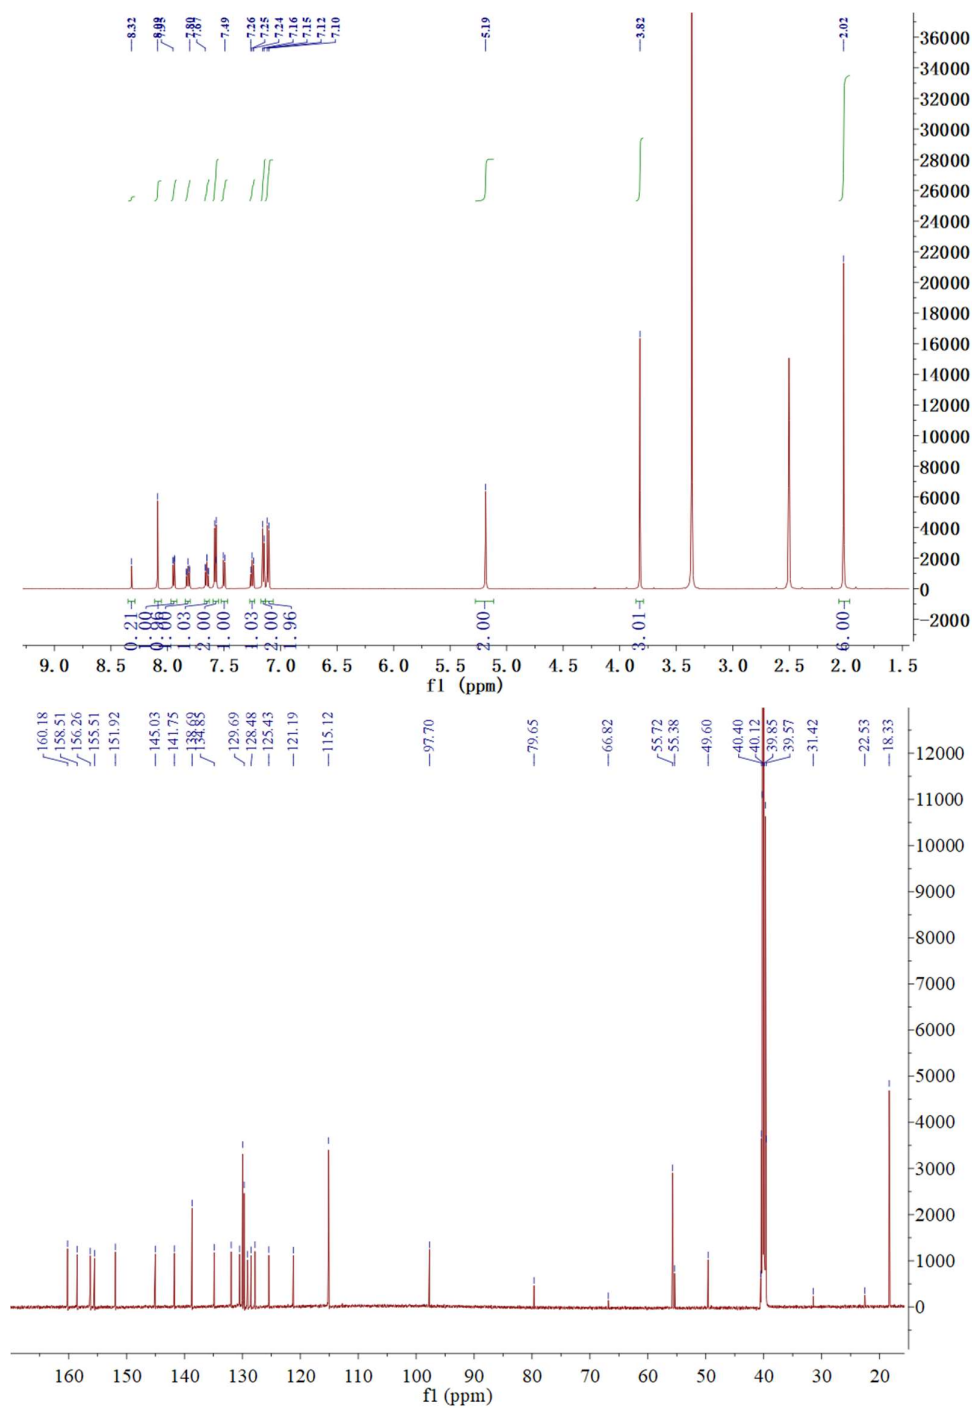



# Compound 15h

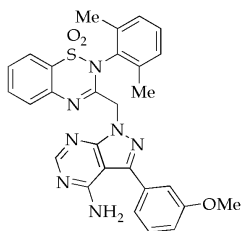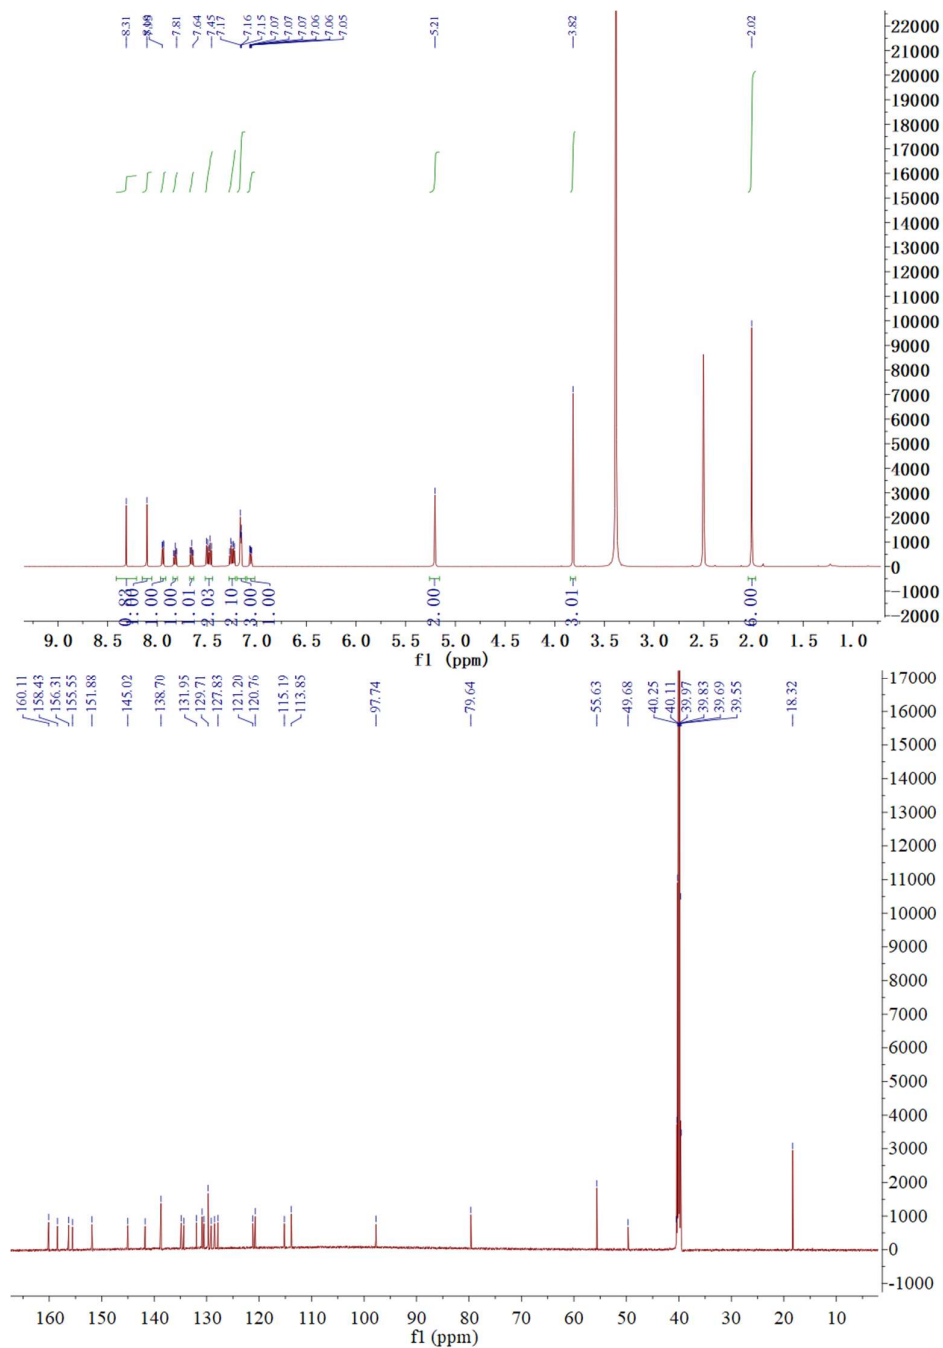

Compound 15i

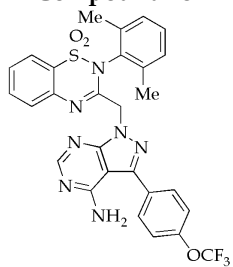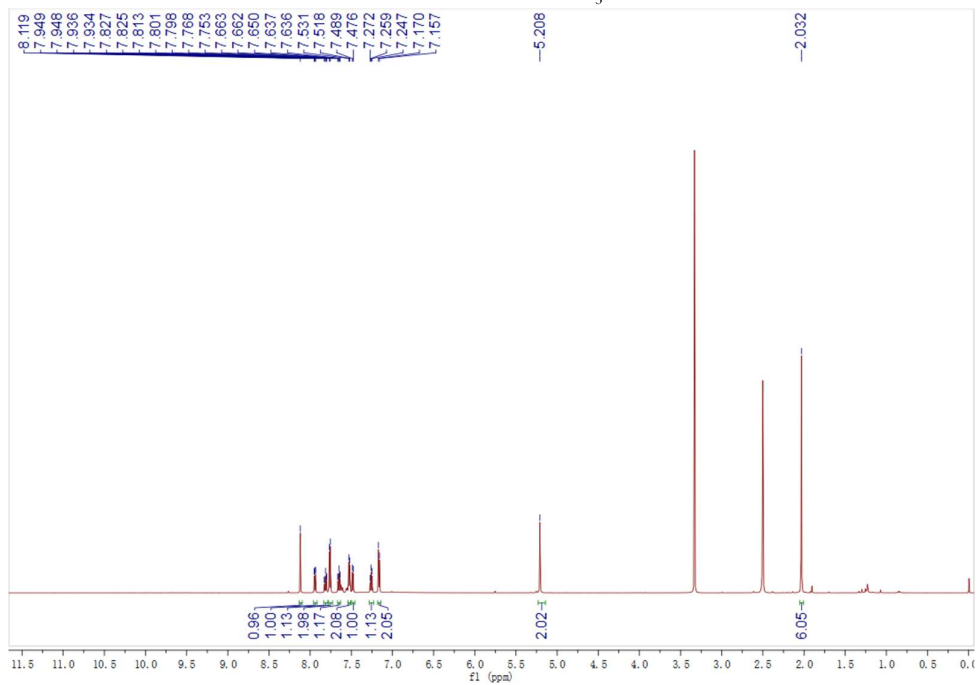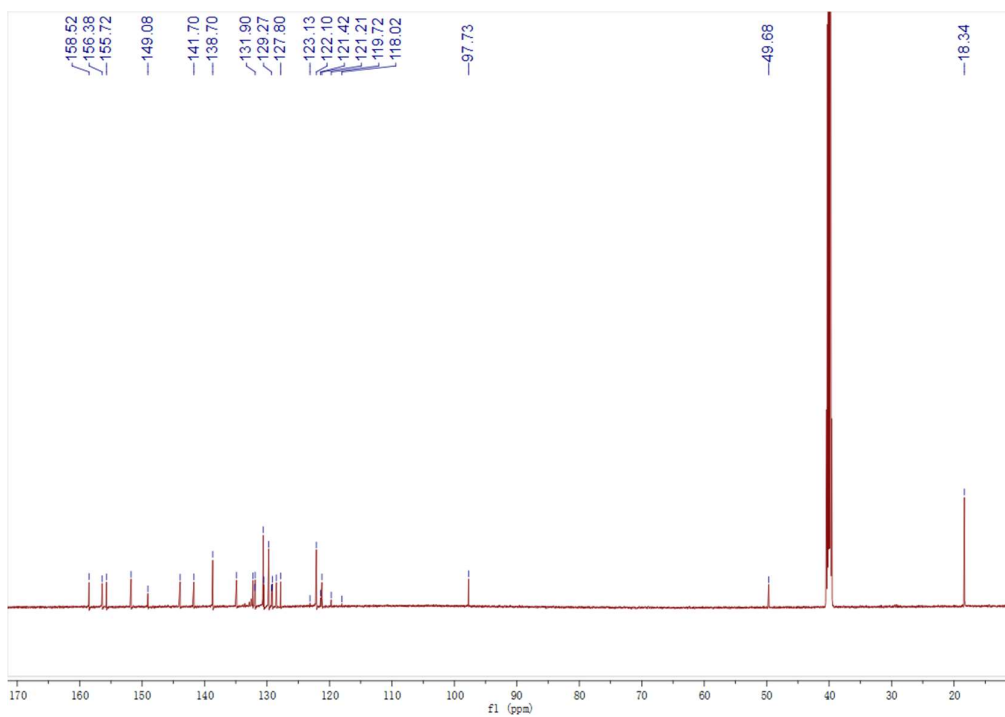

# Compound 15j

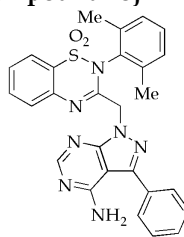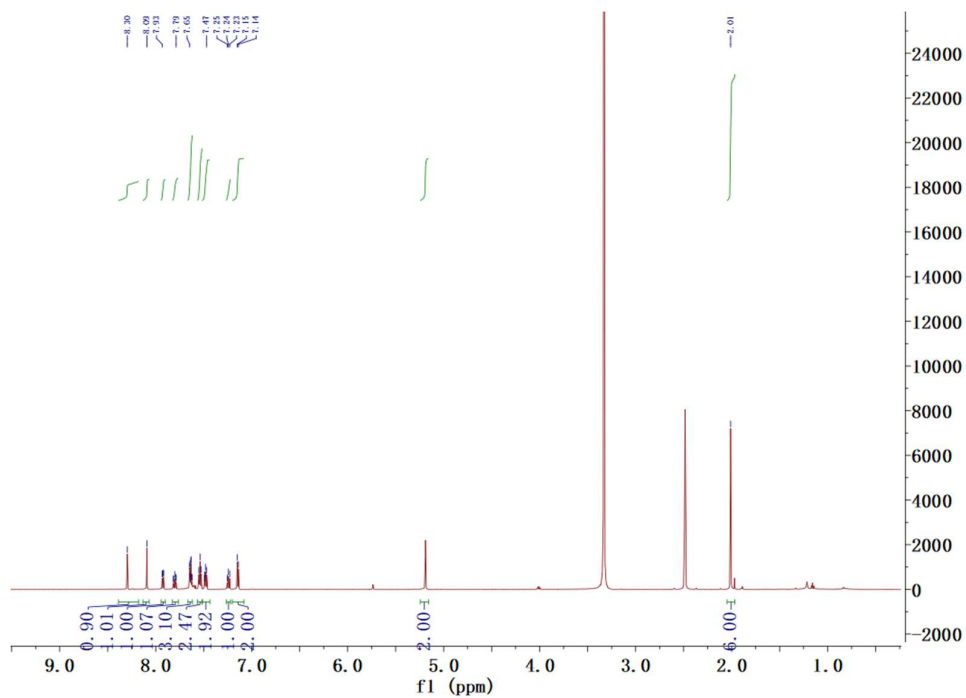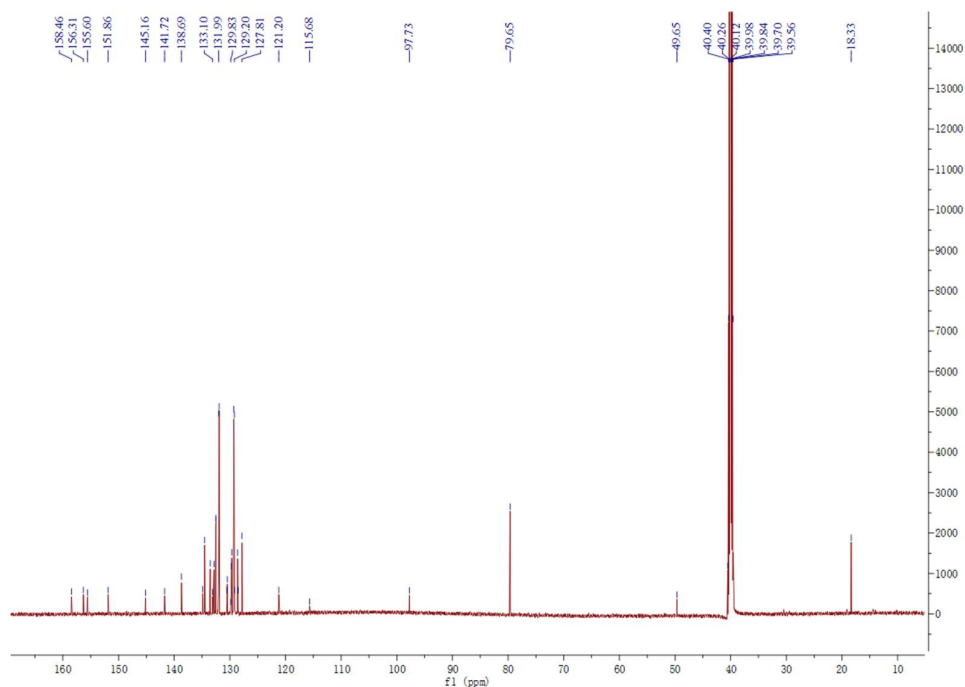

Compound 16a

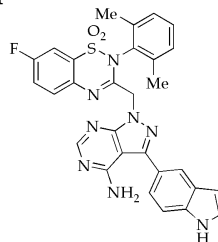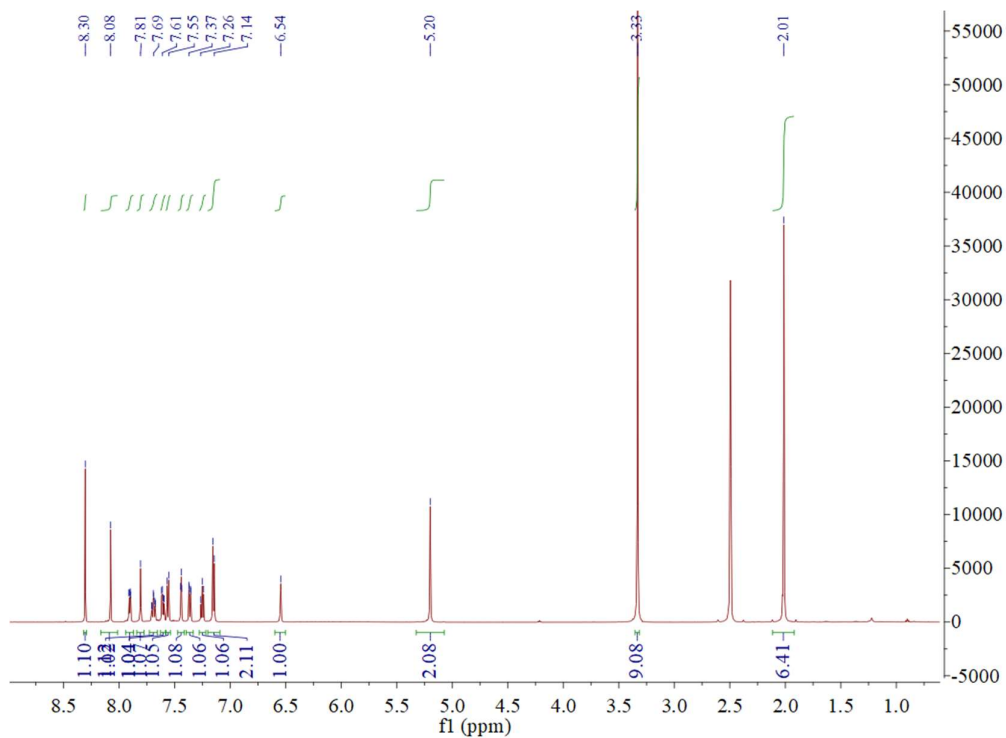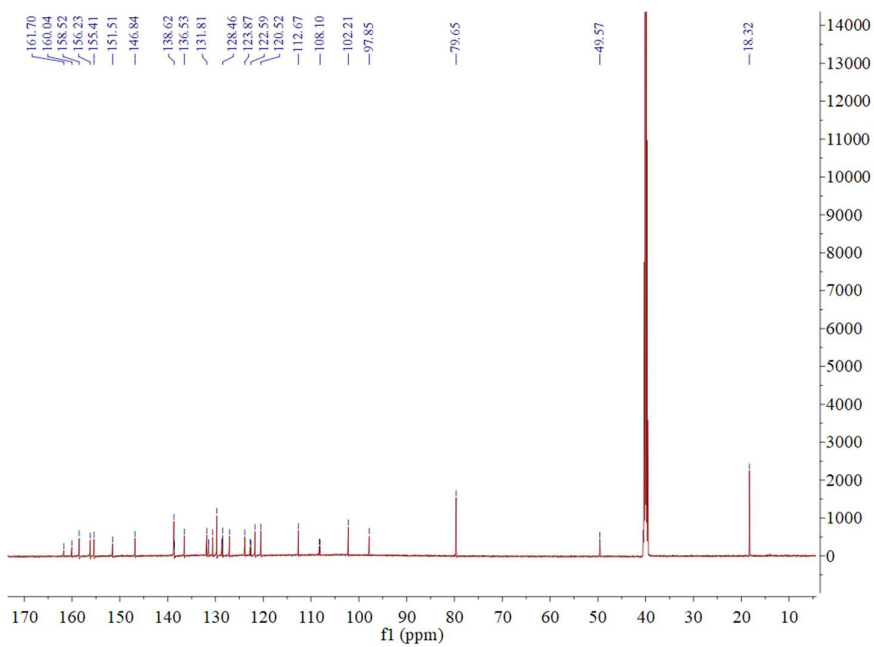

Compound 16b

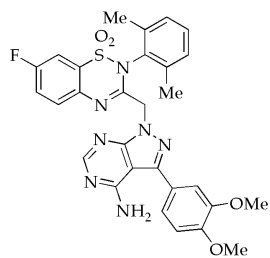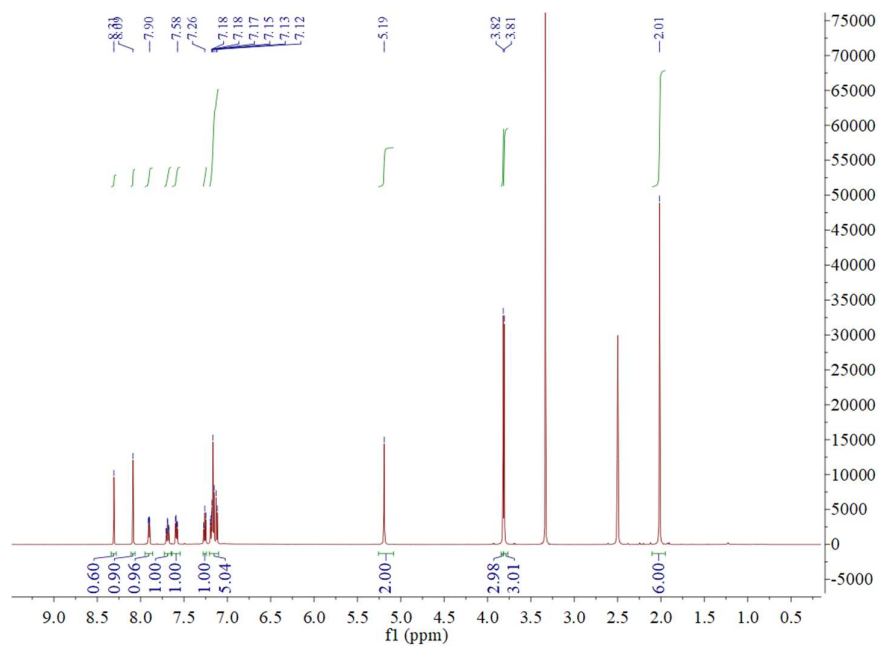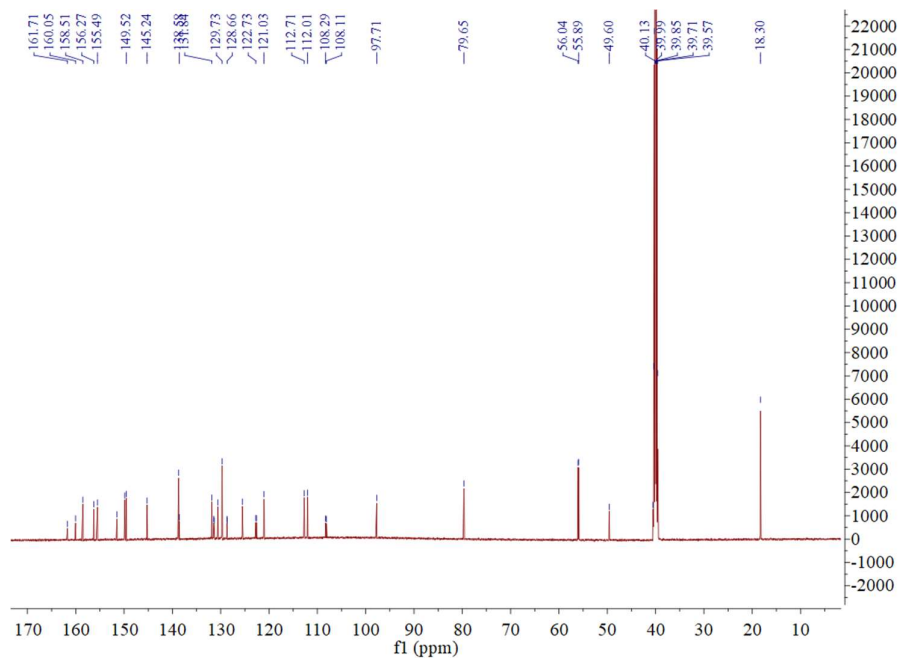

# Compound 16c

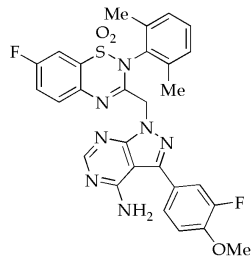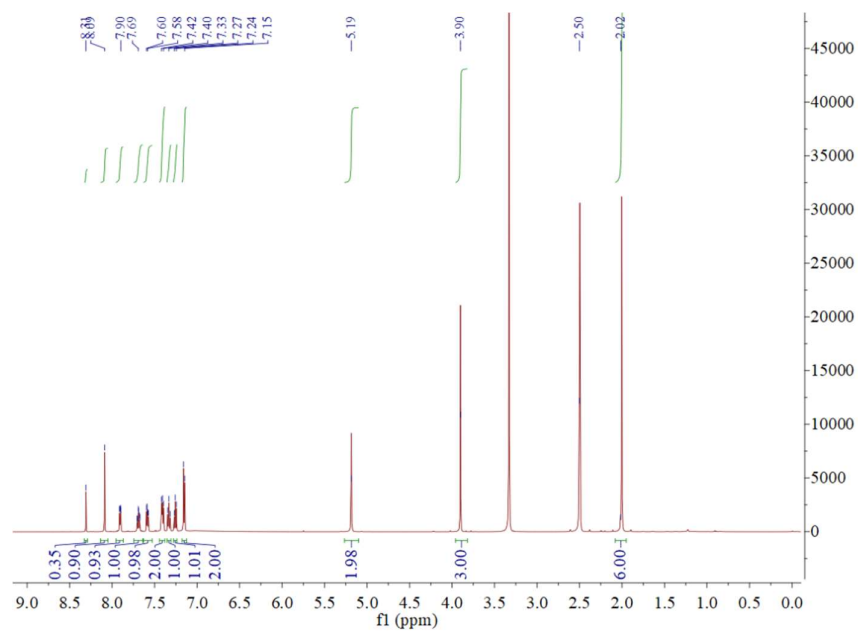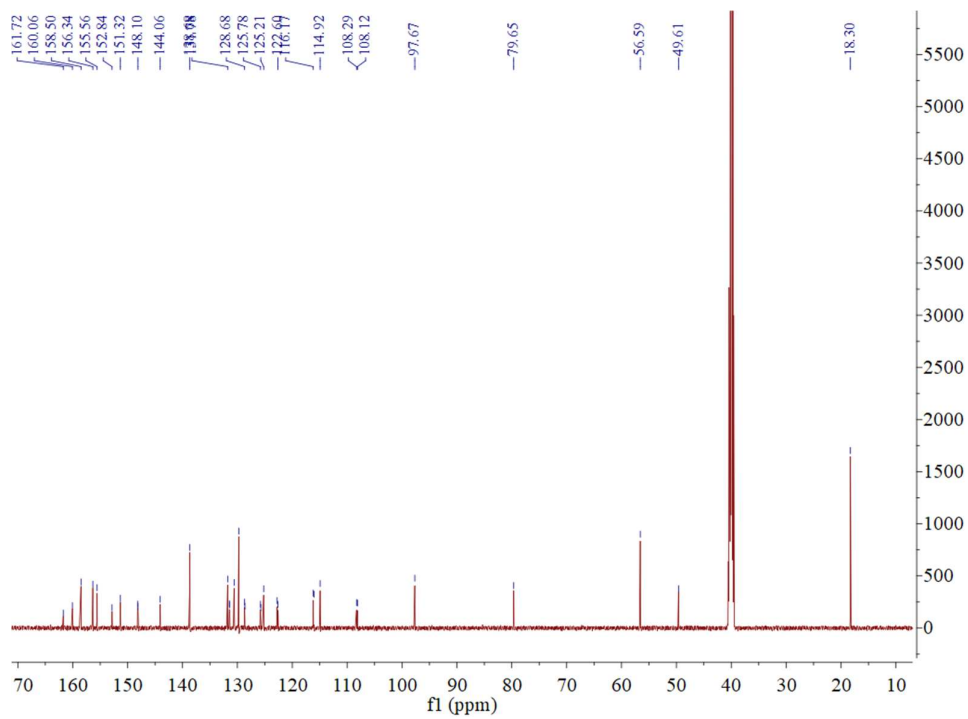

# Compound 16d

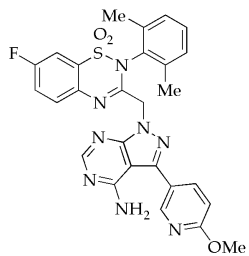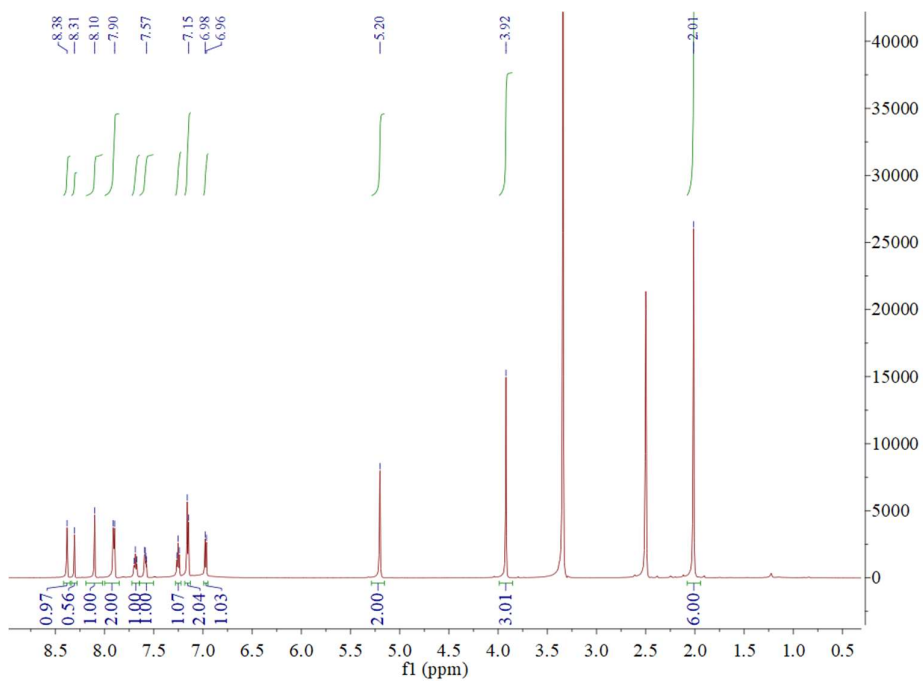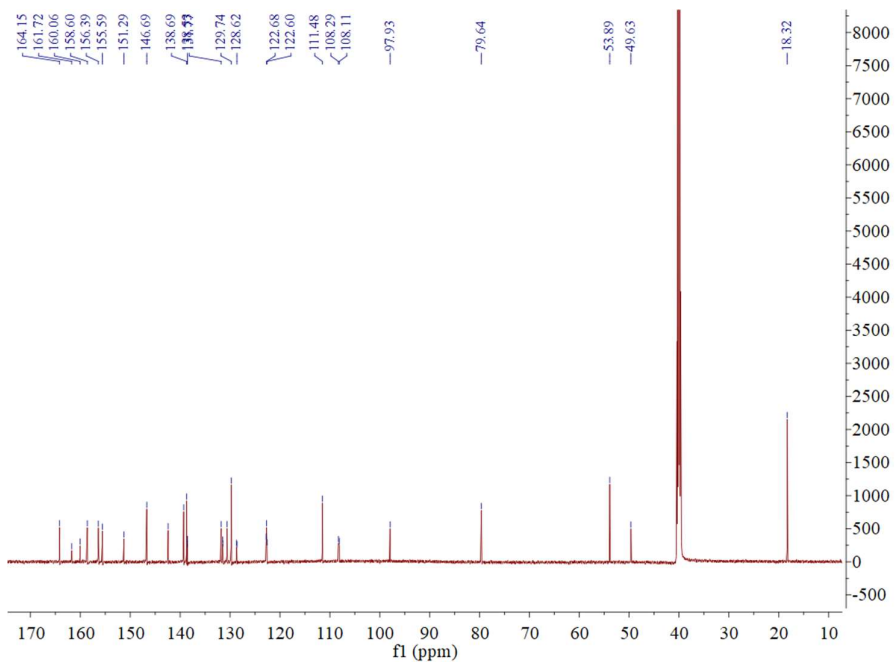

Supplement: s1 [file s1]
